# Supplementary material for: Getting evidence into clinical practice: protocol for evaluation of the implementation of a home-based cardiac rehabilitation programme for patients with heart failure
Source: PubMed Central journal article supplement (PMC7307528; doi:10.1136/bmjopen-2019-036137), 2020-06-21
Supplement: bmjopen-2019-036137supp001.pdf [file bmjopen-2019-036137supp001.pdf]

What are the barriers and enablers to effective implementation of REACH-HF?

## Qualitative interview guide (initial draft\*)

\* The topic guide content may vary depending on feedback from stakeholders and the first few interviews

Beacon site: I / II / III / VI (circle as appropriate)

Date of interview: \_\_\_\_\_

- **Welcome and housekeeping**

*Thank you for agreeing to take part in the study. The interview will last between 30 and 40 minutes. I will ask you a series of questions and I am really interested in your honest opinion on the subject matter. If you wish to stop at any point to take a break, let me know.*

- **Informed consent**

*Thank you for reading PIS and completing the consent form. Is it ok if we start recording?*

- **Interview questions**

| NPT | Questions                                                                                                                                                                 | Comments |
|-----|---------------------------------------------------------------------------------------------------------------------------------------------------------------------------|----------|
| 1.1 | Can you describe REACH-HF intervention and how it differs from your usual way of working?                                                                                 |          |
| 1.3 | How does the intervention affect the nature of your work?                                                                                                                 |          |
| 4.3 | Do you consider it to be worthwhile?                                                                                                                                      |          |
| 1.4 | In your opinion what is the value of REACH-HF intervention? To you? To your patients?                                                                                     |          |
| 1.2 | What is your colleagues understanding of the purpose of REACH-HF intervention?                                                                                            |          |
| 4.2 | Do they consider it to be worthwhile?                                                                                                                                     |          |
| 3.2 | How has implementing REACH-HF affected working relationships within the team?                                                                                             |          |
| 2.1 | Who are the individuals (you can include yourself) that drive REACH-HF forward and get others involved? What are their roles? What are they doing to support the project? |          |
| 3.1 | How easy or difficult has it been to integrate REACH-HF into your existing work?                                                                                          |          |
| 2.2 | How did the team need to change in order to introduce REACH-HF?                                                                                                           |          |
| 2.3 | How do you feel about being involved in the REACH-HF project?                                                                                                             |          |
| 3.3 | How do the skills of the staff delivering REACH-HF match the needs of the programme?                                                                                      |          |

REACH-HF beacon sites, Qualitative interview guide, 20.05.2019, version 1, IRAS 261723

## What are the barriers and enablers to effective implementation of REACH-HF?

|     |                                                                                                                                                                                                                                                                                                        |  |
|-----|--------------------------------------------------------------------------------------------------------------------------------------------------------------------------------------------------------------------------------------------------------------------------------------------------------|--|
| 3.4 | Was REACH-HF training sufficient to allow for successful implementation? If not, what other topics or skills could have been included?<br><br>Are there enough resources available to support the REACH-HF programme?<br><br>Are there any other <b>barriers</b> to delivering REACH-HF on your patch? |  |
| 4.1 | Are you in any way evaluating effectiveness, usefulness or impact of REACH-HF on the service?                                                                                                                                                                                                          |  |
| 4.4 | Can REACH-HF intervention be modified and improved to suit your way of working? If yes, in what way?                                                                                                                                                                                                   |  |
| 2.4 | What is the future of REACH-HF in your service?<br>What factors can <b>enable</b> integration of REACH-HF into a cardiac rehabilitation service?                                                                                                                                                       |  |

- **A few: service-level questions:** *What is the catchment area for your service? What population do you serve?*
- **Ending & debrief**  
*Thank you for taking the time to answer my questions. Is there anything else you would like to add? Or ask me about? I am going to switch off the audio recorder now. If any of what we spoke about affected you in any way we can have a debrief session now.*
